# Supplementary material for: Impact of Dry Eye Disease on Psychological Symptoms in Chinese Doctoral Students Studying Abroad
Source: Research Square preprint supplement (doi:10.21203/rs.3.rs-3386937/v1), 2023-10-03
Supplement: Supplementary file 1 [file 3e2a8ef941b42c41bb6e917b.pdf]

**TABLE 2.** *Univariate Analysis of Potential Influencing Factors for Dry Eye Disease(DED)*

| Characteristic                | Non-DED Group<br>(n=34)  | DED Group<br>(n=95)      | <i>t</i> ( $\chi^2$ ) | <i>P</i> |
|-------------------------------|--------------------------|--------------------------|-----------------------|----------|
| Age (yr)                      | 32.59±7.99               | 37.29±6.97               | 6.012                 | <0.001   |
| Sex (male/female)             | 11/23<br>(32.35%/67.65%) | 29/66<br>(30.53%/69.47%) | 0.039 <sup>a</sup>    | 0.843    |
| VDT use (hr)                  | 7.68±3.42                | 8.29±3.55                | 2.883                 | 0.004    |
| Paper work (hr)               | 3.68±2.83                | 4.13±3.07                | 4.267                 | <0.001   |
| Contact lens use              | 23.53% (8/34)            | 33.68% (32/95)           | 1.207 <sup>a</sup>    | 0.272    |
| History of refractive surgery | 5.88% (2/34)             | 5.26% (5/95)             | 0.019 <sup>a</sup>    | 0.891    |
| Smoking                       | 11.76% (4/34)            | 5.26% (5/95)             | 1.631 <sup>a</sup>    | 0.202    |
| Depression score              | 6.12±6.32                | 9.03±6.69                | 2.753                 | 0.006    |
| Anxiety score                 | 6.41±5.88                | 9.58±7.06                | 4.890                 | <0.001   |
| Stress score                  | 8.00±6.22                | 11.56±6.63               | 3.658                 | <0.001   |

Non-DED group: participants without dry eye disease; DED group: participants with dry eye disease; yr, year; hr, hour; VDT, visual display terminal; The data are presented as mean±SD, or percentage; <sup>a</sup> The value was determined through the utilization of Pearson's chi-square test.
